# Supplementary material for: Establishment and optimization of a hemp (Cannabis sativa L.) agroinfiltration system for gene expression and silencing studies
Source: PubMed Central journal article supplement (PMC7044430; doi:10.1038/s41598-020-60323-9), 2020-02-26
Supplement: 41598_2020_60323_MOESM1_ESM.pdf [file 41598_2020_60323_MOESM1_ESM.pdf]

## Additional Supplementary Information

| <b>Supplementary Table S1. Primer sequences used in this study.</b> |                                                                                                                               |
|---------------------------------------------------------------------|-------------------------------------------------------------------------------------------------------------------------------|
| <b>Genes</b>                                                        | <b>Primer sequence (5'-3')</b>                                                                                                |
| <i>CsPDS</i>                                                        | F: CTTGGCAGATGCAGGTCATA<br>R: TCACCGTCATCATCTTTCCA                                                                            |
| <i>CsF-box</i>                                                      | F: TATCGGCGGAGAGATTTGAG<br>R: TAAGCCCTTCCCTTGATTCC                                                                            |
| <i>uidA Fw</i>                                                      | F: GGTGCACGGGAATATTTGCG<br>R: ATAACGGTTCAGGCACAGCA                                                                            |
| <i>pEarleyGate 101-uidA</i>                                         | F: GGGGACAAGTTTGTACAAAAAAGCAGG<br>CTTCACAATGTTACGTCCTGTAGAAAC<br>R: GGGGACCACTTTGTACAAGAAAGCTGG<br>GTCTTCATTGTTGCCTCCCTGCTGCG |
| <i>pK7GWIWG2(I)-CsPDS</i>                                           | F: GGGGACAAGTTTGTACAAAAAAGCA<br>GGCTTCACACTTTGGAGCTTATCCCAA<br>R: GGGGACCACTTTGTACAAGAAAGCTG<br>GGTCTTACCCAGGTCAGCATCTCATTG   |
